# Supplementary material
Source: PubMed Central journal article supplement (PMC7042849)
Supplement: jama-323-627-s001.pdf [file jama-323-627-s001.pdf]

## Supplementary Online Content

Mosley JD, Gupta DK, Tan J, et al. Predictive accuracy of a polygenic risk score compared with a clinical risk score for incident coronary heart disease: polygenic prediction of CHD risk. *JAMA*. doi:10.1001/jama.2019.21782

**eFigure 1.** Greenwood-Nam-D'Agostino Calibration Plots

**eTable 1.** Baseline Demographics for ARIC Subjects Included in the Analyses and for ARIC Subjects Excluded From the Analyses

**eTable 2.** Baseline Demographics for ARIC Subjects and MESA Subjects, by Sex

**eTable 3.** Hazard Ratios Estimates<sup>1</sup> by Sex for the Polygenic Risk Score Classifier for Selected Percentiles

**eTable 4.** C Statistics Evaluating the Performance of the Polygenic Risk Score in ARIC and MESA, by Sex

**eTable 5.** Performance of Alternative Polygenic Risk Scores in the ARIC Study

**eTable 6.** Analyses Excluding Individuals Taking Lipid-Lowering Statin Medications

**eTable 7.** Reclassification Based on the Net Reclassification Improvement, by Sex

This supplementary material has been provided by the authors to give readers additional information about their work.
